# Supplementary material for: qDSB-Seq is a general method for genome-wide quantification of DNA double-strand breaks using sequencing
Source: PubMed Central journal article supplement (PMC6534554; doi:10.1038/s41467-019-10332-8), 2019-05-24
Supplement: 41467_2019_10332_MOESM1_ESM.pdf [file 41467_2019_10332_MOESM1_ESM.pdf]

## **Supplementary Information**

qDSB-Seq is a general method for genome-wide quantification of DNA double-strand breaks using sequencing

Zhu, Biernacka *et al.*

### **Table of Contents**

Supplementary Figures 1 to 6

Supplementary Tables 1 to 4

## Supplementary Figures

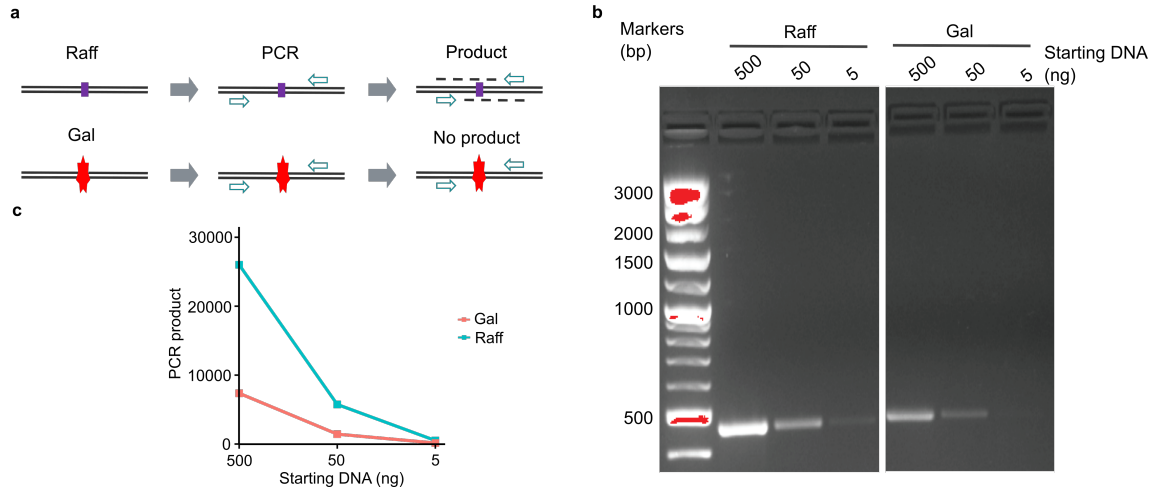

**Supplementary Figure 1.** Estimation of cutting efficiency using semi-quantitative PCR (sqPCR). **(a)** A schema for sqPCR design and its results for cells cultured in raffinose (no I-SceI digestion) and galactose (I-SceI digestion). The purple rectangle and red star represent I-SceI recognition site and the digestion of I-SceI recognition sequence induced by galactose addition, respectively. **(b)** Gel electrophoresis of PCR products in Raff and Gal samples for different amount of starting DNA. **(c)** Quantification of PCR products based on electrophoresis results. Source data are provided as a Source Data file.

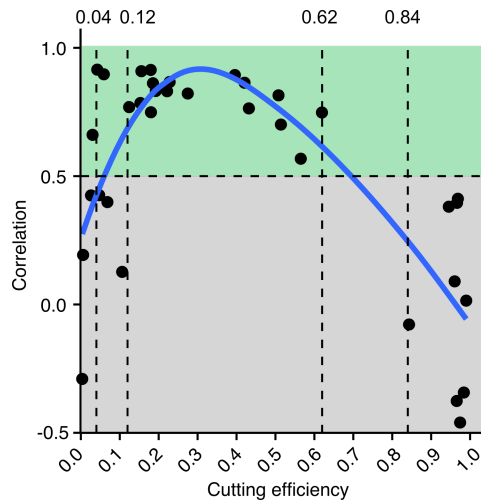

**Supplementary Figure 2.** Pearson correlation between cutting efficiencies and the labeled reads for all sites recognized by a given enzyme was calculated for samples treated with restriction enzymes with multiple cutting sites (35 separate digestions). The green and grey areas were divided by correlation 0.5 that shows strong relationship between cutting efficiencies and the labeled reads for quantification. Source data are provided as a Source Data file.

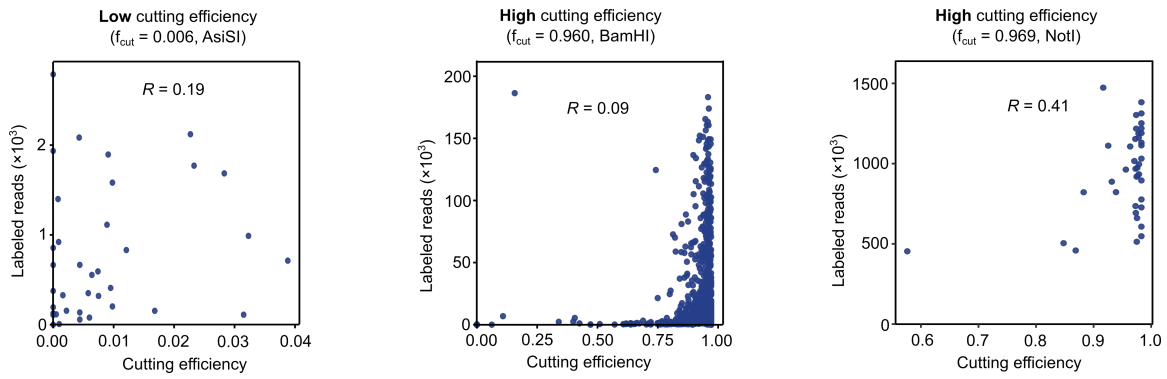

**Supplementary Figure 3.** Employment of extremely low or high cutting efficiencies results in loss of proportional relationship between the labeled reads and cutting efficiencies at enzyme cutting sites. Pearson correlation ( $R$ ) between cutting efficiencies and the labeled reads was calculated for all sites recognized by a given enzyme. From left to right, AsiSI, BamHI, and NotI-treated samples are shown.

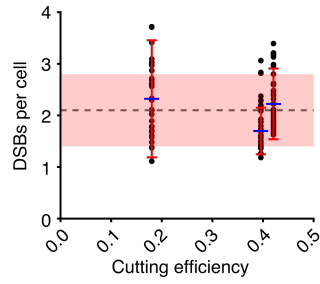

**Supplementary Figure 4.** Quantification of DSBs in  $G_1$  *pif1-m2* mutant cells. The dashed gray line and the pink area are, respectively, the mean value ( $n = 3$ ) and 95% confidence interval for all three biological replicates. DSBs per cell values for individual samples are denoted by blue dash and described in Methods, SD values are denoted by red intervals ( $n = 39$  for each sample). Source data are provided as a Source Data file.

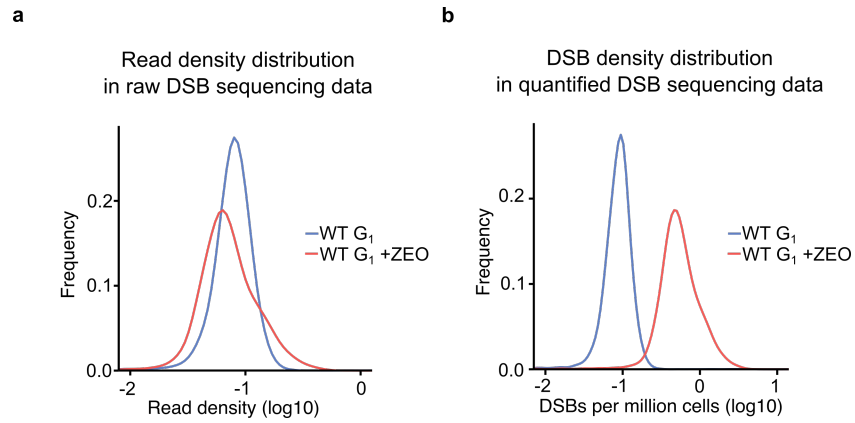

**Supplementary Figure 5.** Density plot of raw and quantified DSB sequencing data for Zeocin-treated and untreated G<sub>1</sub> samples. **(a)** Read density was defined as the number of i-BLESS reads mapped to a given region, divided by region length, here a 500 bp sliding window and a 50 bp step. **(b)** DSB density distribution. DSB density was calculated from quantified DSB numbers per cell using a 500 bp sliding window, divided by region length.

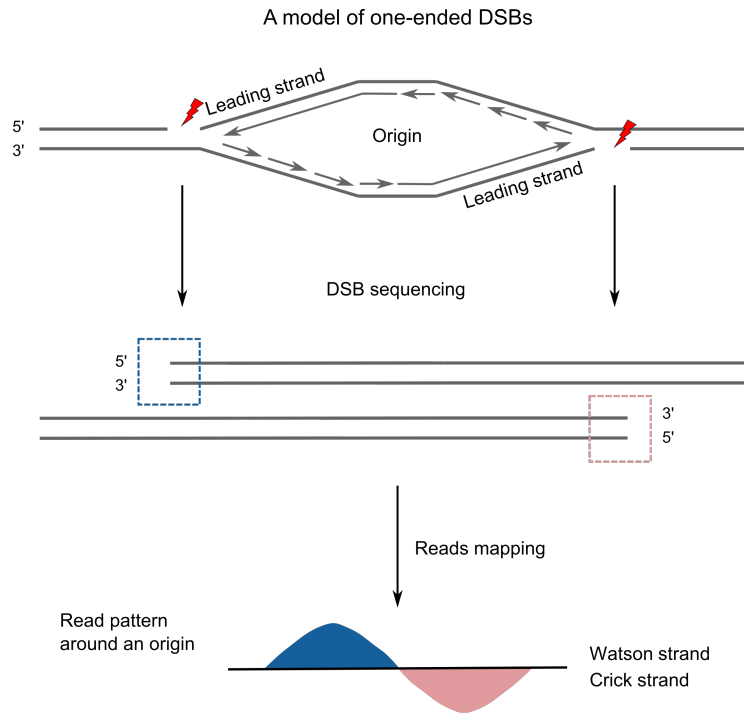

**Supplementary Figure 6.** A characteristic pattern of i-BLESS reads observed for one-ended DSBs. The pattern arises around replication origins due to broken replication forks resulting in one-ended DSBs.

## Supplementary Tables

**Supplementary Table 1.** Pearson correlation between i-BLESS labeled reads and cutting efficiencies from a restriction enzyme.

| Enzyme | Sample name              | Average cutting efficiency | <i>R</i> |
|--------|--------------------------|----------------------------|----------|
| NotI   | G <sub>1</sub> exp6      | 0.04                       | 0.915    |
| NotI   | G <sub>1</sub> exp1      | 0.18                       | 0.914    |
| NotI   | ZEO                      | 0.16                       | 0.909    |
| SrfI   | G <sub>1</sub> exp6      | 0.06                       | 0.897    |
| NotI   | G <sub>1</sub> pif1 exp2 | 0.40                       | 0.894    |
| NotI   | S exp4                   | 0.23                       | 0.867    |
| NotI   | G <sub>1</sub> pif1 exp3 | 0.42                       | 0.864    |
| NotI   | S exp1                   | 0.18                       | 0.862    |
| NotI   | S exp2                   | 0.19                       | 0.832    |
| NotI   | G <sub>1</sub> exp7      | 0.22                       | 0.831    |
| NotI   | S exp6                   | 0.28                       | 0.822    |
| NotI   | G <sub>1</sub> exp10     | 0.51                       | 0.815    |
| NotI   | WT S                     | 0.15                       | 0.786    |
| NotI   | WT +CPT                  | 0.12                       | 0.769    |
| NotI   | G <sub>1</sub> exp8      | 0.43                       | 0.764    |
| NotI   | G <sub>1</sub> pif1 exp1 | 0.18                       | 0.749    |
| NotI   | WT +HU                   | 0.62                       | 0.748    |
| NotI   | G <sub>1</sub> exp9      | 0.51                       | 0.701    |
| AsiSI  | G <sub>1</sub> exp4      | 0.03                       | 0.661    |
| NotI   | G <sub>1</sub> exp7      | 0.56                       | 0.568    |
| NotI   | S exp5                   | 0.05                       | 0.426    |
| NotI   | S exp3                   | 0.03                       | 0.425    |
| NotI   | G <sub>1</sub> exp2      | 0.97                       | 0.412    |
| SrfI   | G <sub>1</sub> exp2      | 0.07                       | 0.399    |
| NotI   | G <sub>1</sub> exp3      | 0.97                       | 0.396    |
| NotI   | G <sub>1</sub> exp5      | 0.94                       | 0.381    |
| AsiSI  | G <sub>1</sub> exp2      | 0.006                      | 0.193    |
| SrfI   | G <sub>1</sub> exp3      | 0.11                       | 0.127    |
| BamHI  | BamHI                    | 0.96                       | 0.090    |



|       |                     |       |        |
|-------|---------------------|-------|--------|
| NotI  | G <sub>1</sub> exp4 | 0.99  | 0.015  |
| SrfI  | G <sub>1</sub> exp4 | 0.84  | -0.078 |
| AsiSI | G <sub>1</sub> exp3 | 0.004 | -0.290 |
| SrfI  | G <sub>1</sub> exp5 | 0.98  | -0.343 |
| AsiSI | G <sub>1</sub> exp5 | 0.97  | -0.376 |
| AsiSI | G <sub>1</sub> exp6 | 0.98  | -0.460 |

Note: only filtered cutting sites were used for calculating Pearson correlation as described in Methods. The results are sorted according to descending *R*.

**Supplementary Table 2.** Absolute DSB frequencies per cell and their variation influenced by low and high cutting efficiencies in G<sub>1</sub> untreated samples. Source data are provided as a Source Data file.

| Sample name                        | Enzyme | Average cutting efficiency | Studied DSBs | SD from multiple cutting sites | SD / Studied DSBs | Number of enzyme cutting sites per Mbases | % of enzyme-induced spike-in reads |
|------------------------------------|--------|----------------------------|--------------|--------------------------------|-------------------|-------------------------------------------|------------------------------------|
| <b>Adequate cutting efficiency</b> |        |                            |              |                                |                   |                                           |                                    |
| G <sub>1</sub> exp6                | NotI   | 0.04                       | 0.7          | 0.6                            | 0.84              | 3                                         | 20                                 |
| G <sub>1</sub> exp6                | SrfI   | 0.06                       | 0.8          | 0.4                            | 0.49              | 2                                         | 11                                 |
| G <sub>1</sub> exp2                | SrfI   | 0.07                       | 0.6          | 0.2                            | 0.41              | 2                                         | 20                                 |
| G <sub>1</sub> exp3                | SrfI   | 0.11                       | 1.7          | 0.7                            | 0.44              | 2                                         | 20                                 |
| G <sub>1</sub> exp1                | NotI   | 0.18                       | 1.1          | 0.3                            | 0.25              | 3                                         | 87                                 |
| Mean                               |        |                            | 1.0          |                                |                   |                                           |                                    |
| SD                                 |        |                            | 0.4          |                                |                   |                                           |                                    |
| G <sub>1</sub> pif1 exp1           | NotI   | 0.18                       | 2.3          | 1.1                            | 0.49              | 3                                         | 75                                 |
| G <sub>1</sub> pif1 exp2           | NotI   | 0.40                       | 1.7          | 0.5                            | 0.27              | 3                                         | 90                                 |
| G <sub>1</sub> pif1 exp3           | NotI   | 0.42                       | 2.2          | 0.7                            | 0.31              | 3                                         | 88                                 |
| Mean                               |        |                            | 2.1          |                                |                   |                                           |                                    |
| SD                                 |        |                            | 0.3          |                                |                   |                                           |                                    |
| <b>Low cutting efficiency</b>      |        |                            |              |                                |                   |                                           |                                    |
| G <sub>1</sub> exp3                | AsiSI  | 0.004                      | 6774         | 1770                           | 0.26              | 3                                         | 0                                  |
| G <sub>1</sub> exp2                | AsiSI  | 0.006                      | 39           | 375                            | 9.65              | 3                                         | 0                                  |
| G <sub>1</sub> exp4                | AsiSI  | 0.03                       | 9.5          | 16.0                           | 1.69              | 3                                         | 1                                  |
| Mean                               |        |                            | 2274         |                                |                   |                                           |                                    |
| SD                                 |        |                            | 3897         |                                |                   |                                           |                                    |
| <b>High cutting efficiency</b>     |        |                            |              |                                |                   |                                           |                                    |
| G <sub>1</sub> exp4                | SrfI   | 0.84                       | 1.3          | 0.5                            | 0.38              | 2                                         | 57                                 |
| G <sub>1</sub> exp5                | NotI   | 0.95                       | 4.0          | 1.9                            | 0.47              | 3                                         | 22                                 |
| G <sub>1</sub> exp15               | BamHI  | 0.96                       | 2.2          | 27                             | 12.40             | 139                                       | 93                                 |
| G <sub>1</sub> exp5                | AsiSI  | 0.97                       | 7.9          | 17                             | 2.20              | 3                                         | 22                                 |
| G <sub>1</sub> exp3                | NotI   | 0.97                       | 11           | 4.1                            | 0.38              | 3                                         | 62                                 |
| G <sub>1</sub> exp2                | NotI   | 0.97                       | 5.6          | 1.9                            | 0.33              | 3                                         | 69                                 |
| G <sub>1</sub> exp6                | AsiSI  | 0.98                       | 5.2          | 2.5                            | 0.48              | 3                                         | 57                                 |
| G <sub>1</sub> exp5                | SrfI   | 0.98                       | 4.0          | 0.9                            | 0.22              | 2                                         | 13                                 |

|                     |      |      |     |     |      |   |    |
|---------------------|------|------|-----|-----|------|---|----|
| G <sub>1</sub> exp4 | NotI | 0.99 | 6.9 | 3.4 | 0.49 | 3 | 31 |
| Mean                |      |      | 5.3 |     |      |   |    |
| SD                  |      |      | 2.9 |     |      |   |    |

**Supplementary Table 3.** DSB frequencies per cell near Replication Fork Barriers (RFBs) in an rDNA array.

|                   | rDSB-1 | rDSB-2 | rDSB-3 | DSBs on RFBs | SD of DSBs on RFBs |
|-------------------|--------|--------|--------|--------------|--------------------|
| WT G <sub>1</sub> | 0.00   | 0.00   | 0.00   | 0.00         | 0.00               |
| WT S              | 0.80   | 0.30   | 0.00   | 1.09         | 0.23               |
| WT +CPT           | 0.76   | 0.28   | 0.11   | 1.15         | 0.28               |

**Supplementary Table 4.** Yeast strains used in this study.

| Strain           | Genotype                                                                                                                                                                       |
|------------------|--------------------------------------------------------------------------------------------------------------------------------------------------------------------------------|
| YBP-275 (I-SceI) | <i>MATa-inc, bar1Δ, ade2-1, can1-100, leu2::SFA1, trp1-1, ura3-1, lys2::GAL1p-ISCEI, adh4::URA3::GAL1p::leu2Δ3'::ACT1iΔ3'::IsceI site his3::HYG:HOSite::ACT1-iΔ5'::leu2Δ5'</i> |
| WT               | <i>MATa, ade2-1, trp1-1, can1-100, leu2-3,112, his3-11,15, ura3; GAL, psi+, RAD5; URA3::GPD-TK(7x)</i>                                                                         |
| <i>pif1-m2</i>   | <i>MATa, ade2-1, ura3-1, his3-11,15, leu2-3, 112, trp1-1, CAN1, GAL, PSI+, sml1:TRP1, pif1-m2</i>                                                                              |
