# Supplementary material for: qDSB-Seq is a general method for genome-wide quantification of DNA double-strand breaks using sequencing
Source: PubMed Central journal article supplement (PMC6534554; doi:10.1038/s41467-019-10332-8), 2019-05-24
Supplement: 41467_2019_10332_MOESM3_ESM.pdf [file 41467_2019_10332_MOESM3_ESM.pdf]

## Description of Additional Supplementary Files

**Supplementary Data 1.** Restriction enzymes cutting sites for *Saccharomyces cerevisiae*, *Homo Sapiens*, *Mus musculus*, *Drosophila melanogaster*, *Arabidopsis thaliana*, and *Caenorhabditis elegans*.
